# Supplementary material
Source: PubMed Central journal article supplement (PMC275452)
Supplement: nar_31_21_6214__1.pdf [file nar_31_21_6214__1.pdf]

## Supplementary Material

### Part 1

**Table A** The number of genes, exons and introns for four species

|                       | gene | exon | intron |
|-----------------------|------|------|--------|
| <i>C.elegans</i>      | 185  | 1138 | 953    |
| <i>A.thaliana</i>     | 749  | 4282 | 3533   |
| <i>D.melanogaster</i> | 1196 | 3722 | 2526   |
| Human                 | 1231 | 6835 | 5604   |

The table gives the number of genes, exons and introns for four species used in the splice site prediction in 10-fold cross validation.

**Table B** Numbers of genes, true and false splice sites in the data sets for four species

|                       | subset | gene | True donor | True acceptor | False donor | False acceptor |
|-----------------------|--------|------|------------|---------------|-------------|----------------|
| <i>C.elegans</i>      | 1      | 60   | 319        | 319           | 17144       | 11940          |
|                       | 2      | 60   | 328        | 328           | 19410       | 14118          |
|                       | 3      | 65   | 306        | 306           | 15070       | 10584          |
| <i>A.thaliana</i>     | 1      | 246  | 1251       | 1251          | 47315       | 30206          |
|                       | 2      | 252  | 1201       | 1201          | 49494       | 32373          |
|                       | 3      | 251  | 1081       | 1081          | 45041       | 28946          |
| <i>D.melanogaster</i> | 1      | 388  | 831        | 831           | 73279       | 38529          |
|                       | 2      | 397  | 830        | 830           | 78395       | 39928          |
|                       | 3      | 411  | 865        | 865           | 77670       | 40174          |
| Human                 | 1      | 399  | 1843       | 1843          | 233681      | 159645         |
|                       | 2      | 408  | 1841       | 1841          | 295501      | 196136         |
|                       | 3      | 424  | 1920       | 1920          | 236109      | 155552         |

The table gives the numbers of genes, true and false splice sites in the data sets for four species used in the acceptor and donor site detection on three disjoint subsets.

### Part 2

#### How to make splice site prediction and exon/intron identification?

The procedure in training set includes:

- (1.1) Calculate  $\xi$  for each potential splice site following Eq.(9).
- (1.2) For each species set a value for  $\xi_D$  and find all candidate donors with  $\xi > \xi_D$ , and set a value for  $\xi_A$  and find all candidate acceptors with  $\xi > \xi_A$ .
- (1.3) In each gene label each candidate splice site  $D$  (GT) or  $A$  (AG) along the sequence by its  $\xi$  value.

- (1.4) In a gene of  $n$  candidate sites we divide them into several successive regions that each region (possibly except the first and the last one) initiates from a  $D$  (say  $D_j$ ) and ends by a  $A$  (say  $A_k$ ). A region is called irreducible if it cannot be further divided. Evidently, only one irreducible division exists for any  $n$ -symbol sequence written by  $D$  and  $A$ . For a given region we predict the first  $D$  in sequence with positive  $\xi$  (if existed) or the  $D$  with the largest  $\xi$  (if all  $D$ 's in the region have  $\xi$  smaller than or equal 0) as the donor, and predict the  $A$  with the largest  $\xi$  as the acceptor. (see following examples)
- (1.5) Identify all introns and exons based on the assignment of donors and acceptors. Note that the first exon of a gene initiates from ATG and the last exon terminates at stop codon. The initiator and terminator have been given in database (see following examples).
- (1.6) Find  $Sn$ ,  $Sp$ ,  $Ac(e)$ ,  $Ac(o)$  and  $Ac(all)$  through the comparison between predicted and true introns and exons following Eq.(10) and (11).
- (1.7) Change the setting of  $\xi_D$  and  $\xi_A$  and repeat the steps from (1.2) to (1.6), then find the best-fit  $\xi_D$  and  $\xi_A$  through the maximization of  $Ac(all)$  and  $(Sn+Sp)/2$  respectively.
- (1.8) List all best-fit  $\xi_D$ 's and  $\xi_A$ 's and the corresponding values of  $Ac(all)$  or  $(Sn+Sp)/2$  in ten computations in 10-fold cross validation. (namely, Table C1 to C4).
- (1.9) Compare the results of 10 computations and find the optimal  $\xi_D$  and  $\xi_A$ .

The procedure in test set includes:

- (2.1) The same as (1.1).
- (2.2) By use of the optimal  $\xi_D$  and  $\xi_A$  find all candidate donors with  $\xi > \xi_D$ , and all candidate acceptors with  $\xi > \xi_A$ .
- (2.3) The same as (1.3).
- (2.4) The same as (1.4).
- (2.5) The same as (1.5).
- (2.6) The same as (1.6).
- (2.7) Average accuracy parameters  $Sn$ ,  $Sp$ ,  $Ac(e)$ ,  $Ac(o)$  and  $Ac(all)$  over 10 computations (in 10-fold cross validation) and list the result in a table (namely, Table 2 in text).
- (2.8) Change the setting of  $\xi_D$  and  $\xi_A$  and repeat the steps from (1.2) to (1.6), and study how the accuracy parameters change with  $\xi_D$  and  $\xi_A$ .
- (2.9) List the variation of accuracy parameters in some given range of  $\xi_D$  and  $\xi_A$ . (Table D)

**Table C1 The best fit values of parameters  $\zeta_D$  and  $\zeta_A$  in 10 computations and corresponding accuracies of prediction for splice sites in training set (*C. elegans*)**

|                  | 1    | 2    | 3    | 4    | 5    | 6    | 7    | 8    | 9    | 10   |
|------------------|------|------|------|------|------|------|------|------|------|------|
| $\zeta_D$        | -10  | -10  | -9   | -10  | -10  | -10  | -9   | -10  | -10  | -10  |
| $\zeta_A$        | -4   | -4   | -3   | -3   | -3   | -4   | -3   | -4   | -2   | -4   |
| $Ac(\text{all})$ | 97.6 | 98.0 | 98.2 | 97.9 | 97.6 | 98.3 | 97.8 | 97.9 | 98.3 | 98.0 |

|               | 1    | 2    | 3    | 4    | 5    | 6    | 7    | 8    | 9    | 10   |
|---------------|------|------|------|------|------|------|------|------|------|------|
| $\zeta_D$     | -10  | -10  | -9   | -9   | -10  | -10  | -9   | -10  | -10  | -10  |
| $\zeta_A$     | -4   | -4   | -3   | -5   | -5   | -4   | -4   | -4   | -4   | -4   |
| $(S_n+S_p)/2$ | 97.2 | 97.3 | 97.4 | 97.5 | 97.0 | 97.3 | 97.0 | 97.0 | 97.4 | 97.4 |

**Table C2 The best fit values of parameters  $\zeta_D$  and  $\zeta_A$  in 10 computations and corresponding accuracies of prediction for splice sites in training set (*A. thaliana*)**

|                  | 1    | 2    | 3    | 4    | 5    | 6    | 7    | 8    | 9    | 10   |
|------------------|------|------|------|------|------|------|------|------|------|------|
| $\zeta_D$        | -5   | -5   | -6   | -5   | -5   | -5   | -4   | -4   | -5   | -5   |
| $\zeta_A$        | -4   | -5   | -4   | -4   | -5   | -5   | -5   | -4   | -5   | -5   |
| $Ac(\text{all})$ | 98.2 | 98.2 | 98.1 | 98.2 | 98.3 | 98.3 | 98.2 | 98.1 | 98.2 | 98.2 |

|               | 1    | 2    | 3    | 4    | 5    | 6    | 7    | 8    | 9    | 10   |
|---------------|------|------|------|------|------|------|------|------|------|------|
| $\zeta_D$     | -5   | -5   | -7   | -5   | -5   | -5   | -4   | -8   | -5   | -5   |
| $\zeta_A$     | -5   | -5   | -4   | -5   | -5   | -5   | -5   | -4   | -5   | -5   |
| $(S_n+S_p)/2$ | 94.7 | 94.6 | 94.5 | 94.8 | 94.8 | 94.8 | 94.4 | 94.3 | 94.5 | 94.6 |

**Table C3 The best fit values of parameters  $\zeta_D$  and  $\zeta_A$  in 10 computations and corresponding accuracies of prediction for splice sites in training set (*D. melanogaster*)**

|                  | 1    | 2    | 3    | 4    | 5    | 6    | 7    | 8    | 9    | 10   |
|------------------|------|------|------|------|------|------|------|------|------|------|
| $\zeta_D$        | -3   | -5   | -4   | -4   | -3   | -4   | -5   | -4   | -5   | -5   |
| $\zeta_A$        | -5   | -3   | -4   | -5   | -5   | -5   | -5   | -5   | -5   | -4   |
| $Ac(\text{all})$ | 97.3 | 97.3 | 97.3 | 97.6 | 97.6 | 97.3 | 97.3 | 97.4 | 97.5 | 97.3 |

|               | 1    | 2    | 3    | 4    | 5    | 6    | 7    | 8    | 9    | 10   |
|---------------|------|------|------|------|------|------|------|------|------|------|
| $\zeta_D$     | -3   | -3   | -3   | -3   | -3   | -4   | -5   | -3   | -4   | -3   |
| $\zeta_A$     | -5   | -5   | -5   | -5   | -5   | -5   | -4   | -5   | -5   | -5   |
| $(S_n+S_p)/2$ | 97.0 | 97.2 | 97.2 | 97.1 | 97.2 | 97.1 | 97.1 | 97.2 | 97.2 | 97.2 |

**Table C4 The best fit values of parameters  $\zeta_D$  and  $\zeta_A$  in 10 computations and corresponding accuracies of prediction for splice sites in training set (human)**

|           |      |      |      |      |      |      |      |      |      |      |
|-----------|------|------|------|------|------|------|------|------|------|------|
|           | 1    | 2    | 3    | 4    | 5    | 6    | 7    | 8    | 9    | 10   |
| $\zeta_D$ | -2   | -2   | -2   | -4   | -2   | -6   | -4   | -2   | -4   | -2   |
| $\zeta_A$ | -1   | 0    | 0    | 0    | 0    | 0    | 0    | 0    | 0    | 0    |
| $Ac(all)$ | 94.3 | 94.1 | 94.5 | 94.4 | 94.3 | 94.3 | 94.3 | 94.5 | 94.1 | 94.2 |

  

|             |      |      |      |      |      |      |      |      |      |      |
|-------------|------|------|------|------|------|------|------|------|------|------|
|             | 1    | 2    | 3    | 4    | 5    | 6    | 7    | 8    | 9    | 10   |
| $\zeta_D$   | -4   | -4   | -4   | -4   | -4   | -4   | -4   | -4   | -4   | -4   |
| $\zeta_A$   | -1   | -1   | -1   | -1   | -1   | -1   | -1   | -1   | -1   | -1   |
| $(Sn+Sp)/2$ | 88.8 | 88.9 | 89.0 | 88.7 | 88.9 | 88.8 | 88.6 | 88.9 | 88.6 | 88.8 |

In above Table C1 to C4 the optimal  $\zeta_D$  and  $\zeta_A$  with respect to  $Ac(all)$  and with respect to the average of  $Sn$  and  $Sp$ ,  $(Sn+Sp)/2$ , in 10 computations are listed.

**Table D The variation of prediction accuracy for splice sites in test set with parameter  $\zeta_D$  in a range from -10 to 0 and  $\zeta_A$  from -5 to 0**

|                        | range of $Sn$ (%) | range of $Sp$ (%) | range of $Ac(all)$ (%) |
|------------------------|-------------------|-------------------|------------------------|
| <i>C. elegans</i>      | (88.5, 94.8)      | (96.3, 97.7)      | (95.2, 97.1)           |
| <i>A. thaliana</i>     | (86.3, 93.6)      | (93.1, 96.0)      | (94.5, 97.7)           |
| <i>D. melanogaster</i> | (92.3, 96.4)      | (95.4, 98.1)      | (94.6, 96.9)           |
| Human (1)              | (82.4, 89.8)      | (71.7, 91.9)      | (88.0, 93.9)           |
| Human (2)              | (82.4, 89.1)      | (80.6, 91.9)      | (91.6, 93.9)           |

For *C. elegans*, *A. thaliana*, *D. melanogaster* and Human (1)  $\zeta_D$  changes between (-10,0) and  $\zeta_A$  changes between (-5,0); for Human (2)  $\zeta_D$  changes between (-10,0) but  $\zeta_A$  changes between (-3,0).

**Example 1: > 9084\_CELGES1B protein\_id:AAA28057.1; Caenorhabditis elegans gut esterase (ges1) gene, complete cds.**

| candidate donor                                      |                                                             | candidate acceptor                       |                                           | predicted intron sites | true intron sites |
|------------------------------------------------------|-------------------------------------------------------------|------------------------------------------|-------------------------------------------|------------------------|-------------------|
| site                                                 | $\zeta_D$                                                   | site                                     | $\zeta_A$                                 |                        |                   |
| 163<br>168                                           | 6.46<br>0.21                                                | 100<br><br>204<br>228                    | -4.44<br><br>-1.91<br>-0.62               | 163 — 228              | 163 — 228         |
| 524<br>528<br>623<br>639<br>988<br>996               | 6.81<br>3.01<br>-9.69<br>-3.97<br>0.08<br>-8.81             | <br><br><br><br><br>1542<br>1552<br>1902 | <br><br><br><br><br>1.52<br>4.78<br>-2.23 | 524 — 1552             | 524 — 1542        |
| 2045<br>2048<br>2056<br>2074<br>2077<br>2458<br>2672 | -4.21<br>-1.01<br>12.58<br>-5.55<br>-0.79<br>-4.45<br>-1.99 | <br><br><br><br><br><br>2719             | <br><br><br><br><br><br>23.46             | 2056 — 2719            | 2056 — 2719       |
| 2953<br>3031                                         | 9.23<br>-7.56                                               | <br>3072                                 | <br>12.18                                 | 2953 — 3072            | 2953 — 3072       |
| 3215                                                 | 4.66                                                        | 3299                                     | -3.22                                     | 3215 — 3299            | 3215 — 3254       |
| 3365<br>3388<br>3395<br>3523<br>3547<br>3889<br>3902 | -2.66<br>9.09<br>-8.67<br>-7.85<br>1.82<br>4.71<br>-5.67    | <br><br><br><br><br><br>4156             | <br><br><br><br><br><br>26.17             | 3388 — 4156            | 3388 — 4156       |
| 4255<br>4267                                         | -0.56<br>8.55                                               | <br>4330                                 | <br>14.33                                 | 4267 — 4330            | 4267 — 4330       |

**Example2: > 2372\_CECED4A protein\_id:CAA48781.1; C.elegans ced-4 gene**

| candidate donor                 |                                          | candidate acceptor                   |                                          | predicted intron sites | true intron sites          |
|---------------------------------|------------------------------------------|--------------------------------------|------------------------------------------|------------------------|----------------------------|
| site                            | $\zeta_D$                                | site                                 | $\zeta_A$                                |                        |                            |
| 443<br>452                      | -4.57<br>6.41                            | 91<br><br>502                        | -2.40<br><br>8.63                        | 452 — 502              | 452 — 502                  |
| 597<br>604                      | 6.34<br>-3.14                            | <br>640                              | <br>7.37                                 | 597 — 640              | 597 — 640                  |
| 731<br>735<br>750<br>792<br>984 | 2.85<br>-1.49<br>-7.89<br>-0.71<br>11.54 | <br><br><br><br>1033<br>1238         | <br><br><br><br>9.98<br>-0.17            | 731 — 1033             | 731 — 916<br>984 — 1033    |
| 1372<br>1650                    | 6.76<br>2.35                             | <br>2134                             | <br>5.95                                 | 1372 — 2134            | 1372 — 1928                |
| 2205                            | 4.25                                     | 2252<br>2270<br>2404<br>2462<br>2513 | 20.76<br>3.29<br>20.44<br>-3.40<br>-2.60 | 2205 — 2252            | 2205 — 2252<br>2359 — 2404 |
